# Supplementary material
Source: Springer Nature journal article supplement (https://www.springermedizin.de/resource/supplementary/12936_2007_361_MOESM1_ESM.pdf/9547640)

interviewed key respondents=65

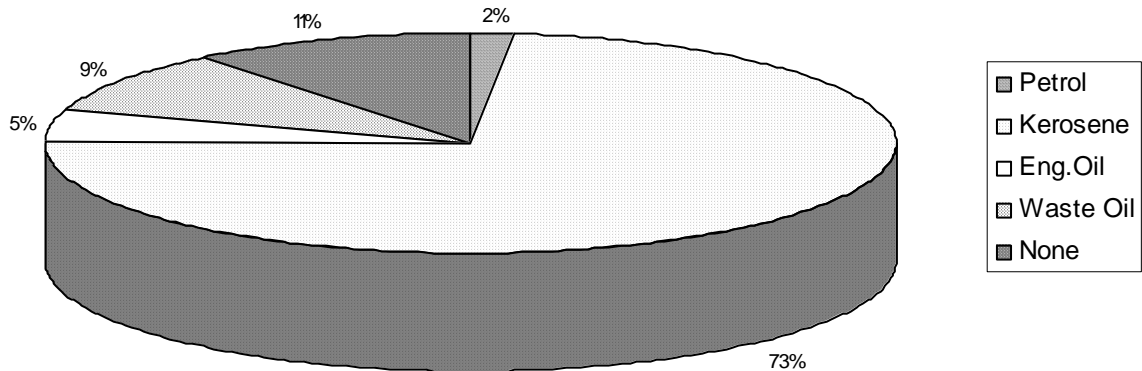

Supplement: MOESM1 [file 9547640]
